# Supplementary material for: Unbiased proteomic profiling of host cell extracellular vesicle composition and dynamics upon HIV‐1 infection
Source: PubMed Central journal article supplement — EMBO J. 2021 Mar 11;40(8):e105492. doi: 10.15252/embj.2020105492 (PMC8047442; doi:10.15252/embj.2020105492), 2021-03-11
Supplement: EMBJ-40-e105492-s001.pdf [file EMBJ-40-e105492-s001.pdf]

## APPENDIX

### Table of Content

Appendix Figure S1: p1

Appendix Figure S2: p2

Appendix Table S1: p3

### Appendix Figure S1. Scheme of the experimental workflow.

48h CCM was obtained from Jurkat cells metabolically labeled with SILAC medium (Lys 4, Arg 6) (A) or SILAC heavy (Lys 8, Arg 10) (B) aminoacid-isotypes. CCM was centrifuged to remove cells (300g 20 min) and large vesicles + nanoparticles (2000g 20 min). (A) The supernatant was subjected to serial ultracentrifugation with increasing speeds to obtain fractions F1, F2 and F3. (B) The three fractions contain similar amount of protein as shown by gel electrophoresis and Coomassie stain. (C) For SILAC heavy-labeled cells the supernatant was subjected directly to the high-speed centrifugation to obtain the reference pellet (Ref). The three fractions in (A) were pooled with Ref fraction in three (Ctrl Jurkat analysis), or two (comparison of Ctrl and HIV-1 infected Jurkat) biological replicates. The same protocol was used for HIV-1 NL4-3 EGFP-Nef+ infected cells.

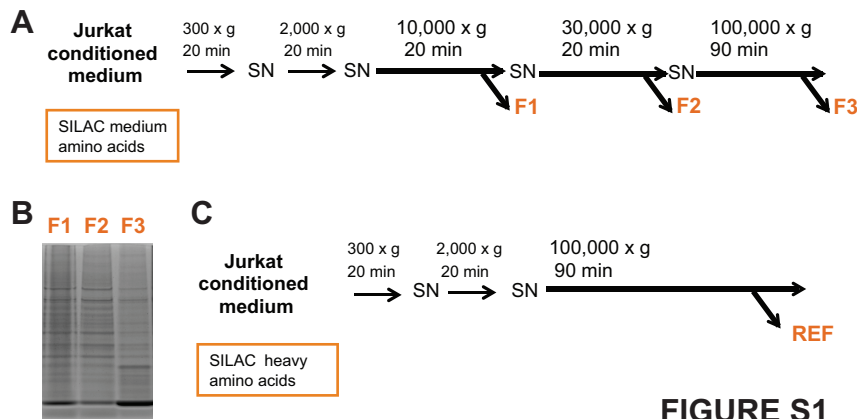

**Appendix Figure S2. Identification by unbiased proteomic analysis of candidate EV proteins changing location upon HIV infection.**

(A) Abundance profiles of over 3000 proteins in EVs recovered after 10K (F1), 30K (F2) and 100K (F3) centrifugations (see Fig S1), from non-infected and HIV-1-infected Jurkat cells were subjected to PCA. Proximity of proteins indicates similar profiles. HIV-1 proteins were identified in the same quadrant as the majority of sEVs protein markers (highlighted in green). Proteins used here as markers for sEVs were identified previously (Kowal *et al*, 2016) as specific of CD9- or CD63- or CD81-bearing sEVs in human Dendritic Cells (Table S1) (B) Proteomic abundance profiles of MOV10 and CD55 proteins across the six subfractions, showing modified distribution of MOV10 upon HIV-1 infection, whereas distribution of CD55 does not change significantly. Each profile is shown in two independent data triplets.

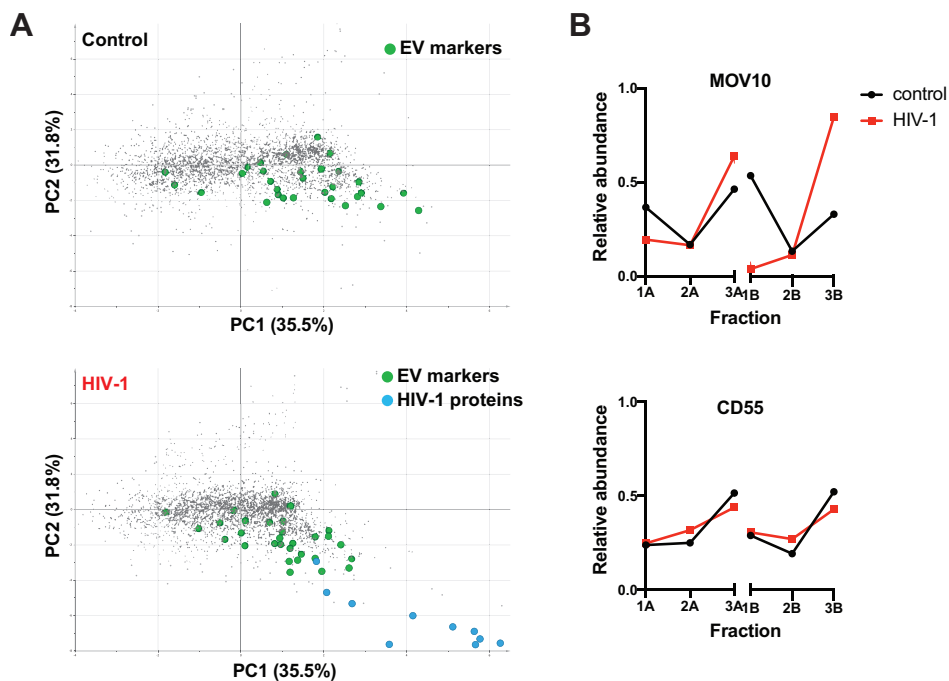

**Appendix Table S1. Proteins used as markers of small EVs in Fig 2.**

This table lists some proteins specifically secreted in small EVs (recovered in 100K pellets) expressing at least CD63 or CD81 or CD9 (i.e. present in the pull-down after immuno-isolation using antibodies against one of these tetraspanins), but not in small EVs devoid of all these tetraspanins (i.e. absent or very low in the flow-throughs after immuno-isolation using anti-CD9 antibodies), according to our previous proteomic analysis of Dendritic Cell-derived EVs (Kowal *et al*, 2016). A protein was considered present if identified by at least 1 peptide in at least two of the three biological replicates.

| Uniprot<br>_ gene<br>name | major subcellular<br>localisation (according to<br>Uniprot)              | present (Yes/No)<br>in EVs (pull-<br>down)<br>CD63 <sup>+</sup> CD9 <sup>+</sup><br>CD81 <sup>+</sup> | Present (Yes/No)<br>in EVs negative<br>for (Flow-<br>through)<br>CD63 <sup>-</sup> CD9 <sup>-</sup> CD81 <sup>-</sup> |
|---------------------------|--------------------------------------------------------------------------|-------------------------------------------------------------------------------------------------------|-----------------------------------------------------------------------------------------------------------------------|
| ABI1_<br>ABI1             | cytosol, nucleus, plasma<br>membrane                                     | Y Y<br>Y                                                                                              | Y Y(±) Y                                                                                                              |
| ANXA7_<br>ANXA7           | nucleus, ER, extracellular                                               | Y Y<br>Y                                                                                              | Y Y(±) Y                                                                                                              |
| ARRD1_<br>ARRDC1          | cytosol, plasma<br>membrane                                              | Y Y<br>Y                                                                                              | N N N                                                                                                                 |
| CD166_<br>ALCAM           | Single-pass<br>transmembrane, plasma<br>membrane                         | N Y<br>Y                                                                                              | Y N N                                                                                                                 |
| CD53_<br>CD53             | Multi-pass<br>transmembrane, plasma<br>membrane                          | Y Y<br>Y                                                                                              | Y N Y                                                                                                                 |
| CD63_<br>CD63             | Multi-pass<br>transmembrane,<br>endosomes, lysosomes,<br>plasma membrane | Y Y<br>Y                                                                                              | N N N                                                                                                                 |
| CD9_<br>CD9               | Multi-pass<br>transmembrane, plasma<br>membrane                          | Y Y<br>Y                                                                                              | Y N Y                                                                                                                 |
| CD81_<br>CD81             | Multi-pass<br>transmembrane, plasma<br>membrane                          | Y Y<br>Y                                                                                              | Y N N                                                                                                                 |
| CD82_<br>CD82             | Multi-pass<br>transmembrane, plasma<br>membrane                          | Y Y<br>Y                                                                                              | Y N N                                                                                                                 |
| CHM1A_<br>CHMP1A          | cytosol, nucleus,<br>endosomes, peripheral<br>membrane                   | Y Y<br>Y                                                                                              | N N Y                                                                                                                 |
| CHM2A_<br>CHMP2A          | cytosol, endosomes,<br>peripheral membrane                               | Y Y<br>Y                                                                                              | N N N                                                                                                                 |
| CHM2B_<br>CHMP2B          | cytosol, endosomes,<br>peripheral membrane                               | Y N<br>Y                                                                                              | N N N                                                                                                                 |

|                        |                                                                |        |   |   |      |      |
|------------------------|----------------------------------------------------------------|--------|---|---|------|------|
| CHM4A_<br>CHMP4A       | cytosol, endosomes,<br>peripheral membrane                     | Y<br>Y | Y | N | N    | Y    |
| CHM4B_<br>CHMP4B       | cytosol, nucleus,<br>endosomes, peripheral<br>membrane         | Y<br>Y | Y | N | N    | Y    |
| CTL1_<br>SLC44A1       | Multi-pass<br>transmembrane, plasma<br>membrane, mitochondrion | Y<br>Y | Y | Y | Y(±) | Y    |
| FBLN1_<br>FBLN1        | secreted, binds to ECM                                         | N<br>Y | N | N | N    | N    |
| FPRP_<br>PTGFRN        | Single-pass<br>transmembrane, ER, Golgi                        | Y<br>Y | Y | Y | Y(±) | Y    |
| GDIB_<br>GDI2          | cytosol, peripheral<br>membrane                                | Y<br>Y | Y | N | N    | N    |
| GRAN_<br>GCA           | cytosol, focal adhesions                                       | Y<br>Y | N | N | N    | N    |
| IGSF8_<br>IGSF8        | Single-pass<br>transmembrane, plasma<br>membrane               | Y<br>Y | Y | Y | N    | N    |
| IST1_<br>IST1          | cytosol, centrosome,<br>midbody                                | Y<br>Y | Y | Y | Y(±) | Y(±) |
| LDHA_<br>LDHA          | cytosol                                                        | Y<br>Y | Y | N | N    | N    |
| M4K4_<br>MAP4K4        | cytosol                                                        | Y<br>Y | Y | N | N    | N    |
| MINK1_<br>MINK1        | cytosol, plasma<br>membrane, Golgi                             | Y<br>Y | Y | N | N    | N    |
| PACN2_<br>PACSN2       | cytosol, plasma<br>membrane, endosomes                         | Y<br>Y | Y | Y | N    | Y    |
| PDC6I_<br>PDCD6IP      | cytosol, extracellular                                         | Y<br>Y | Y | Y | Y(±) | Y    |
| PDCD6_<br>PDCD6        | nucleus, endosome, ER                                          | Y<br>Y | Y | Y | Y(±) | Y    |
| PI42A_<br>PIP4K2A      | cytosol, plasma<br>membrane, nucleus                           | Y<br>Y | Y | Y | N    | Y    |
| PLS3_<br>PLSCR3        | cytosol                                                        | Y<br>Y | Y | N | N    | N    |
| PPIB_<br>PPIB          | ER lumen                                                       | Y<br>Y | Y | Y | Y(±) | Y(±) |
| PPR18_<br>PPP1R18      | cytoskeleton                                                   | N<br>Y | Y | N | N    | N    |
| RHG18_<br>ARHGAP<br>18 | cytosol                                                        | Y<br>Y | Y | Y | N    | N    |
| SDCB1_<br>SDCBP        | cytosol, plasma<br>membrane, extracellular                     | Y<br>Y | Y | Y | Y(±) | Y    |
| SELPL_<br>ELPLG        | Single-pass<br>transmembrane                                   | N<br>Y | Y | Y | N    | N    |
| SH3G1_<br>H3GL1        | cytosol, early endosome,<br>plasma membrane                    | Y<br>Y | Y | N | N    | N    |

|                           |                                                                 |          |          |          |          |          |          |
|---------------------------|-----------------------------------------------------------------|----------|----------|----------|----------|----------|----------|
| <b>SRGP2_<br/>SRGAP2</b>  | <b>nucleus, plasma<br/>membrane</b>                             | <b>Y</b> | <b>Y</b> | <b>Y</b> | <b>Y</b> | <b>N</b> | <b>Y</b> |
| <b>SYK_KA<br/>RS</b>      | <b>cytosol, extracellular</b>                                   | <b>Y</b> | <b>Y</b> | <b>Y</b> | <b>Y</b> | <b>N</b> | <b>Y</b> |
| <b>TAOK1_T<br/>AOK1</b>   | <b>cytosol</b>                                                  | <b>Y</b> | <b>Y</b> | <b>Y</b> | <b>N</b> | <b>N</b> | <b>N</b> |
| <b>TNAP3_T<br/>NFAIP3</b> | <b>nucleus, cytosol,<br/>lysosome</b>                           | <b>Y</b> | <b>Y</b> | <b>N</b> | <b>N</b> | <b>N</b> | <b>N</b> |
| <b>TRI25_<br/>TRIM25</b>  | <b>cytosol</b>                                                  | <b>Y</b> | <b>Y</b> | <b>Y</b> | <b>N</b> | <b>N</b> | <b>N</b> |
| <b>TS101_<br/>TSG101</b>  | <b>cytosol, endosomes,<br/>nucleus, centrosome</b>              | <b>Y</b> | <b>Y</b> | <b>Y</b> | <b>N</b> | <b>N</b> | <b>N</b> |
| <b>TTYH3_<br/>TTYH3</b>   | <b>Multi-pass<br/>transmembrane, plasma<br/>membrane</b>        | <b>Y</b> | <b>Y</b> | <b>Y</b> | <b>N</b> | <b>N</b> | <b>N</b> |
| <b>VPS28_<br/>VPS28</b>   | <b>cytosol, plasma<br/>membrane, late<br/>endosomes</b>         | <b>Y</b> | <b>Y</b> | <b>N</b> | <b>N</b> | <b>N</b> | <b>N</b> |
| <b>VP37C_V<br/>PS37C</b>  | <b>cytosol, late endosome,<br/>peripheral membrane</b>          | <b>N</b> | <b>Y</b> | <b>N</b> | <b>N</b> | <b>N</b> | <b>N</b> |
| <b>VPS4A_<br/>VPS4A</b>   | <b>cytosol, late endosome,<br/>plasma membrane,<br/>midbody</b> | <b>Y</b> | <b>Y</b> | <b>Y</b> | <b>N</b> | <b>N</b> | <b>N</b> |
| <b>VPS4B_<br/>VPS4B</b>   | <b>cytosol, late endosome,<br/>plasma membrane,<br/>midbody</b> | <b>Y</b> | <b>Y</b> | <b>Y</b> | <b>N</b> | <b>N</b> | <b>N</b> |
